# Supplementary material
Source: Springer Nature journal article supplement (https://www.springermedizin.de/resource/supplementary/12936_2008_651_MOESM7_ESM.pdf/9547918)

**Incremental cost per patient: multiway 1**

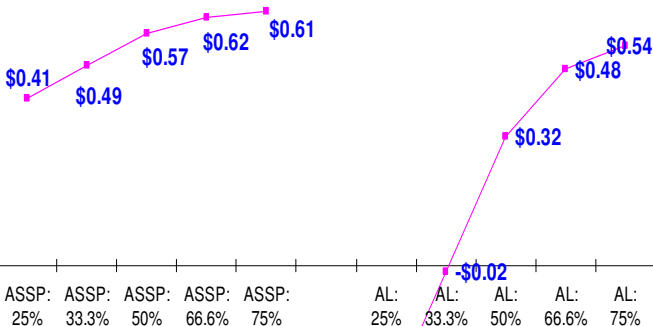

**Incremental cost per patient: multiway 2**

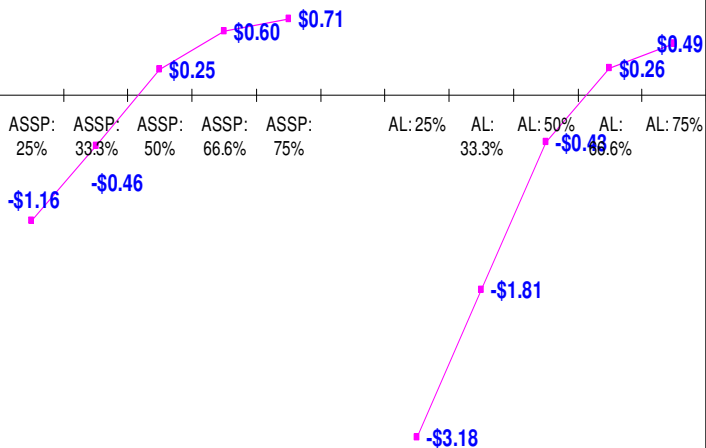

**Incremental cost per patient: multiway 3**

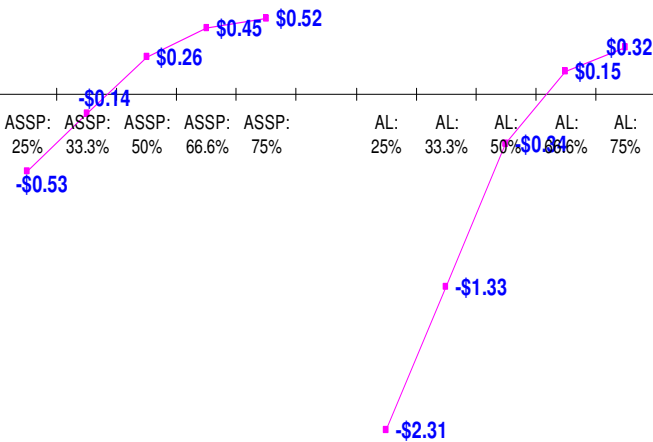

**Incremental cost per patient: multiway 4**

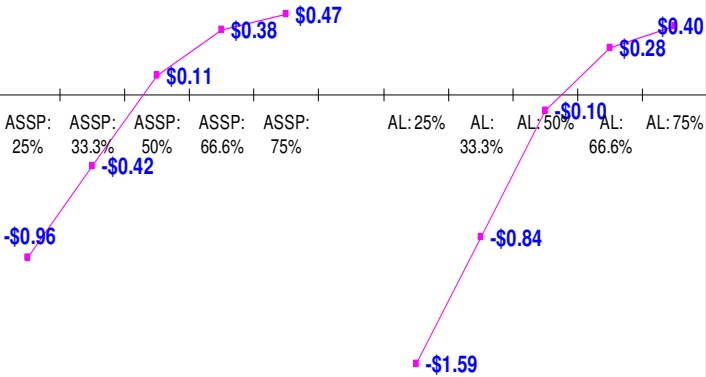

Supplement: MOESM7 [file 9547918]
